# Supplementary material for: Epigenetic Regulation of Peroxisome Proliferator-Activated Receptor Gamma Mediates High-Fat Diet-Induced Non-Alcoholic Fatty Liver Disease
Source: MDPI journal article supplement (doi:10.3390/cells10061355), 2021-05-31
Supplement: s1 [file s1]

## **Supplementary Materials**

**Table S1: Composition of low fat (LFD) and high fat (HFD) diets**

The top part of the table shows the percent composition of macronutrients and the lower part of shows detailed ingredients' composition.

| <b>Diets</b>                 | <b>Low fat diet (LFD)</b> |                 | <b>High fat diet (HFD)</b> |                 |
|------------------------------|---------------------------|-----------------|----------------------------|-----------------|
| <b>Product number</b>        | <b>D13052302</b>          |                 | <b>D13052306</b>           |                 |
| <b>%</b>                     | <b>g (%)</b>              | <b>Kcal (%)</b> | <b>g (%)</b>               | <b>Kcal (%)</b> |
| <b>Protein</b>               | 19.2                      | 20.0            | 26.2                       | 20.0            |
| <b>Carbohydrate</b>          | 67.3                      | 70.0            | 26.3                       | 20.1            |
| <b>Fat</b>                   | 4.3                       | 10.0            | 34.9                       | 59.9            |
| <b>Total</b>                 |                           | 100             |                            | 100             |
| <b>Kcal/gm</b>               |                           | 3.85            |                            | 5.24            |
| <b>Ingredients</b>           | <b>g</b>                  | <b>kcal</b>     | <b>g</b>                   | <b>kcal</b>     |
| <b>Casein</b>                | 200                       | 800             | 200                        | 800             |
| <b>L-Cystine</b>             | 3                         | 12              | 3                          | 12              |
| <b>Corn Starch</b>           | 506.2                     | 2024.8          | 0                          | 0               |
| <b>Maltodextrin 10</b>       | 125                       | 500             | 125                        | 500             |
| <b>Sucrose</b>               | 68.8                      | 275.2           | 68.8                       | 275.2           |
| <b>Cellulose</b>             | 50                        | 0               | 50                         | 0               |
| <b>Soybean oil</b>           | 25                        | 225             | 25                         | 225             |
| <b>Cocoa butter</b>          | 20                        | 180             | 20                         | 180             |
| <b>Palm oil</b>              | 0                         | 0               | 225                        | 2025            |
| <b>Mineral Mix S10021</b>    | 10                        | 0               | 10                         | 0               |
| <b>Dicalcium Phosphate</b>   | 13                        | 0               | 13                         | 0               |
| <b>Calcium carbonate</b>     | 5.5                       | 0               | 5.5                        | 0               |
| <b>Potassium Citrate</b>     | 16.5                      | 0               | 16.5                       | 0               |
| <b>Vitamin Mix V10001</b>    | 10                        | 40              | 10                         | 40              |
| <b>Choline Bitartrate</b>    | 2                         | 0               | 2                          | 0               |
| <b>Red Dye, FD&amp;C #40</b> | 0                         | 0               | 0.05                       | 0               |
| <b>Blue Dye, FD&amp;C #5</b> | 0.05                      | 0               |                            | 0               |
| <b>Total</b>                 | 1055.05                   | 4057            | 773.85                     | 4057.2          |
